# Supplementary material
Source: publisher figshare collection journal article supplement (https://geolsoc.figshare.com/ndownloader/files/27599793)
Supplement: Supplementary file 1 [file 27599793]

## Sheet: Sheet1
Sample ID	Experiment No.	36Ar [fA]	%2σ	37Ar [fA]	%2σ	38Ar [fA]	%2σ	39Ar [fA]	%2σ	40Ar [fA]	%2σ	40(r)/39(k)	± 2σ	Age (Ma)	± 2σ	40Ar(r) (%)	39Ar(k) (%)
J = 0.00484330 ± 0.00000387
NC17	025_VU107-M4	0.00041149	152.667	0.00340383	379.277	0.00415073	11.6104	0.367483	7.71024	19.3318	0.348235	52.2718	4.06663	413.298	28.7819	99.3642	0.826603
NC17	049_VU107-M4	-0.000785271	91.7908	-0.00201406	554.515	0.00442878	8.28523	0.390356	5.5789	21.4838	0.339136	55.6357	3.15795	436.952	22.0637	101.089	0.878062
NC17	053_VU107-M4	0.000269916	190.019	-0.00142464	828.334	0.00661313	8.2076	0.574526	5.13866	33.6085	0.313933	58.3563	3.01614	455.863	20.8563	99.7584	1.29233
NC17	033_VU107-M4	5.53505e-05	953.33	-0.000695453	1177.19	0.00738823	10.4094	0.592817	2.92002	30.9158	0.319692	52.1218	1.55396	412.236	11.0047	99.9448	1.33347
NC17	045_VU107-M4	-5.09401e-05	844.899	0.000252458	3993.05	0.00692799	7.33565	0.602626	5.1997	36.6887	0.310453	60.9058	3.17971	473.408	21.7776	100.04	1.35554
NC17	039_VU107-M4	0.0444961	1.85178	-0.00124928	629.907	0.0182006	3.47383	0.785265	2.5843	59.3587	0.303313	58.6721	1.56557	458.045	10.8128	77.6183	1.76636
NC17	024_VU107-M4	0.000246982	226.827	0.00502225	214.709	0.00922886	5.15413	0.796844	3.50228	40.8597	0.310498	51.1842	1.81188	405.584	12.8779	99.8188	1.7924
NC17	032_VU107-M4	0.000368047	152.853	0.0019499	526.96	0.0101441	4.88548	0.80479	2.60666	44.2279	0.314566	54.8187	1.45441	431.235	10.1933	99.7504	1.81028
NC17	036_VU107-M4	0.000537958	98.7892	-0.00491526	226.568	0.0104523	5.45019	0.806013	2.60941	46.8811	0.306328	57.9634	1.53562	453.144	10.6345	99.6552	1.81304
NC17	047_VU107-M4	-0.000455373	118.81	-0.00587334	167.767	0.00971763	5.51732	0.807488	3.33027	44.1312	0.317401	54.8191	1.84471	431.238	12.9288	100.305	1.81636
NC17	015_VU107-M4	0.000799935	76.8751	0.000487924	2165.57	0.0100227	5.94664	0.827817	2.49868	44.1344	0.308158	53.025	1.35337	418.621	9.55077	99.4573	1.86207
NC17	021_VU107-M4	0.000459453	117.013	-0.00547213	178.931	0.009891	6.59112	0.832093	2.35165	44.288	0.348376	53.0583	1.27611	418.856	9.00438	99.6877	1.8717
NC17	046_VU107-M4	-0.000937099	53.1272	0.00284715	365.962	0.0105265	6.57553	0.860669	2.33916	48.5905	0.307018	56.7813	1.35056	444.939	9.39486	100.575	1.93597
NC17	018_VU107-M4	0.000312476	139.086	-0.00164069	623.191	0.0104565	5.15114	0.885909	2.48066	48.2528	0.306276	54.3606	1.36665	428.022	9.59508	99.8048	1.99275
NC17	035_VU107-M4	0.000726723	79.9418	-0.0065976	156.828	0.0111237	6.88914	0.893877	2.45697	50.2113	0.303032	55.9281	1.39816	438.994	9.75765	99.5653	2.01068
NC17	038_VU107-M4	0.00120547	47.4861	0.00846601	142.971	0.0120767	3.74873	0.941879	2.5778	52.8814	0.310271	55.7627	1.4593	437.84	10.1908	99.3192	2.11863
NC17	027_VU107-M4	0.000450742	126.084	0.00349097	239.988	0.010954	3.80463	0.994541	2.95707	59.1284	0.30564	59.3172	1.77168	462.495	12.2067	99.7714	2.2371
NC17	030_VU107-M4	0.00228073	27.8653	-0.00125185	686.741	0.0123223	4.81261	1.00999	2.18976	55.2824	0.302927	54.0603	1.21002	425.912	8.5052	98.7665	2.27186
NC17	014_VU107-M4	0.000310602	213.178	-0.00556502	207.798	0.0120334	5.66052	1.04434	2.13636	56.436	0.309056	53.9495	1.17988	425.134	8.29684	99.8333	2.34913
NC17	052_VU107-M4	0.000202106	229.968	0.00950823	110.002	0.0129839	4.5268	1.07874	2.53587	57.7265	0.301767	53.4572	1.37125	421.669	9.66084	99.8952	2.42648
NC17	058_VU107-M4	0.048936	2.48253	-0.000666419	1593.42	0.0220756	2.81715	1.09089	2.49447	74.3774	0.30152	54.7864	1.42171	431.009	9.96536	80.3552	2.45383
NC17	057_VU107-M4	0.00188037	34.747	0.00514371	199.375	0.0137031	4.84022	1.10303	1.86692	62.7758	0.302892	56.4027	1.08157	442.303	7.53456	99.1048	2.48114
NC17	031_VU107-M4	0.000289873	195.609	0.00550135	159.099	0.0137515	4.66734	1.11868	1.56108	61.9721	0.307474	55.3197	0.893141	434.743	6.24765	99.8595	2.51634
NC17	017_VU107-M4	0.00138575	35.6597	-0.00204568	472.664	0.0136125	5.2495	1.12852	2.14748	60.9972	0.305589	53.6831	1.17192	423.26	8.24934	99.3199	2.53847
NC17	023_VU107-M4	0.00180032	23.1562	0.00290851	334.619	0.0143554	5.36074	1.25039	1.98463	74.9653	0.351779	59.5232	1.20412	463.914	8.28982	99.2819	2.81259
NC17	051_VU107-M4	0.000757816	69.6084	0.00217845	391.336	0.0167771	4.39379	1.29957	2.32957	73.8977	0.30003	56.6885	1.33708	444.293	9.30438	99.6926	2.92322
NC17	026_VU107-M4	0.00248427	24.2351	-0.000639304	1418.06	0.0171682	3.00126	1.35788	1.86147	79.3645	0.30117	57.9004	1.10007	452.707	7.62	99.0639	3.05438
NC27	060_VU107-M1	0.0148538	5.49294	0.00823475	171.938	0.0373093	2.46565	2.88799	0.616388	176.248	0.294806	59.4919	0.417091	463.699	2.87182	97.4828	2.53789
NC17	020_VU107-M4	0.000913172	63.7371	5.65416e-05	14796.6	0.016914	4.45273	1.37358	1.58732	76.6433	0.302088	55.5987	0.907347	436.694	6.34026	99.6428	3.08971
NC17	037_VU107-M4	0.00192073	32.5832	0.0073468	126.312	0.017689	4.99987	1.40393	1.67887	76.7048	0.301523	54.2269	0.934711	427.083	6.56586	99.2516	3.15797
NC17	011_VU107-M4	0.000579305	87.4896	-0.00269631	474.336	0.0179185	3.25197	1.49232	1.22786	88.6948	0.307064	59.3173	0.757663	462.496	5.22021	99.8033	3.3568
NC17	048_VU107-M4	-0.000177077	339.626	0.00769298	165.527	0.0181655	4.71788	1.5288	1.27983	83.7367	0.302259	54.8071	0.730221	431.155	5.11802	100.062	3.43884
NC17	013_VU107-M4	0.000692763	92.9872	-0.00304257	370.019	0.0195393	4.37272	1.64983	1.46071	88.4617	0.297508	53.4922	0.80596	421.915	5.67745	99.7643	3.7111
NC17	029_VU107-M4	0.00121429	48.1981	0.00676958	154.251	0.022337	2.83296	1.84905	1.27057	105.362	0.297519	56.7855	0.74715	444.968	5.1973	99.6549	4.1592
NC17	019_VU107-M4	0.00117239	45.2465	0.00594509	159.89	0.0275345	2.51399	2.1567	1.65449	121.27	0.293152	56.0666	0.94501	439.961	6.59166	99.7103	4.85123
NC17	055_VU107-M4	0.000825626	71.525	0.0134732	56.5975	0.0265622	4.51477	2.19987	1.47441	121.466	0.30271	55.1029	0.833322	433.226	5.83404	99.7964	4.94832
NC17	012_VU107-M4	0.000985944	65.7418	0.0124142	99.8503	0.0356781	2.24286	2.99798	0.955513	163.876	0.333214	54.5636	0.556025	429.447	3.90074	99.8194	6.74358
NC17	054_VU107-M4	0.00101141	43.4104	0.010974	81.0802	0.0420529	1.5774	3.55764	0.799255	189.586	0.313277	53.2044	0.45832	419.886	3.23214	99.8396	8.00247
J = 0.00484330 ± 0.00000387
NC19	254_VU107-M8	-0.00174133	41.0254	-0.00177238	714.459	0.00119769	48.5099	0.0891088	31.7758	5.99785	0.594469	73.1406	23.3671	555.341	153.033	108.665	0.190758
NC19	247_VU107-M8	0.000126689	439.341	-0.00172289	677.832	0.00308499	13.579	0.229444	10.4533	13.5448	0.390932	58.8666	6.20027	459.388	42.7917	99.7184	0.491174
NC19	159_VU107-M8_2	0.000532974	120.023	-0.00208784	1483.85	0.00276797	22.2794	0.249677	0.795024	14.8562	0.193021	58.8625	0.904114	459.36	6.23992	98.9263	0.534487
NC19	252_VU107-M8	-0.000758478	71.6357	0.00359257	305.956	0.00315631	14.8075	0.258708	9.98583	13.9625	0.389136	54.8461	5.51666	431.427	38.6598	101.622	0.553811
NC19	186_VU107-M8_2	0.00027108	230.208	0.03714	68.8938	0.00304126	18.2465	0.275801	0.738392	15.6471	0.239782	56.4549	0.805495	442.667	5.61021	99.4999	0.590353
NC19	211_VU107-M8	0.000612494	90.6552	0.00625782	178.602	0.00356275	15.5365	0.310724	11.8656	19.8612	0.346147	63.3322	7.53703	489.951	51.1561	99.0804	0.665159
NC19	214_VU107-M8	0.000413364	123.952	-3.43926e-05	26057.2	0.00446864	13.2319	0.326107	18.7129	21.4814	0.339537	65.493	12.2666	504.559	82.5955	99.4243	0.698098
NC19	248_VU107-M8	0.000120624	632.263	0.00575493	189.189	0.00379014	13.8571	0.329994	9.46216	17.9849	0.350994	54.3926	5.19635	428.247	36.4785	99.8007	0.706411
NC19	255_VU107-M8	-7.05663e-06	8691.64	0.000191669	6286.57	0.00410846	11.7659	0.331486	5.46958	16.7374	0.334891	50.4975	2.82178	400.697	20.1093	100.011	0.709613
NC19	236_VU107-M8	0.00207035	37.8837	0.00181659	614.002	0.00492867	11.7967	0.334475	6.67959	20.0046	0.339083	57.9609	3.93958	453.126	27.2825	96.9095	0.716008
NC19	157_VU107-M8_2	0.00245708	21.6866	-0.0137354	189.637	0.00511691	10.2639	0.356495	0.844625	20.049	0.186492	54.1762	0.647744	426.727	4.55095	96.3343	0.763168
NC19	167_VU107-M8_2	0.00104508	62.9443	0.0269089	105.945	0.00421254	11.7846	0.358275	0.714444	20.3177	0.157501	55.8468	0.683938	438.427	4.77462	98.4732	0.76692
NC19	246_VU107-M8	0.000446222	105.094	0.00148561	799.836	0.00488933	11.4372	0.379727	7.03237	19.3211	0.351569	50.5303	3.57704	400.931	25.4885	99.3095	0.81288
NC19	230_VU107-M8	0.00042009	171.96	0.00157764	578.524	0.00481203	11.1977	0.398695	8.93178	19.9936	0.340129	49.8326	4.48694	395.952	32.0591	99.3716	0.853486
NC19	155_VU107-M8_2	0.000719554	58.4817	0.0245038	104.45	0.00508205	14.9918	0.4126	0.844655	22.9619	0.139133	55.1372	0.561841	433.466	3.9329	99.0713	0.883218
NC19	174_VU107-M8_2	0.000152213	356.905	-0.0223668	89.192	0.00451698	12.9976	0.416495	0.696626	23.8302	0.154455	57.0999	0.563633	447.154	3.91605	99.8004	0.891623
NC19	237_VU107-M8	0.00175997	40.7757	0.00274416	491.749	0.00515312	11.3449	0.422455	7.55829	25.6902	0.319424	59.5678	4.53497	464.221	31.2159	97.9541	0.904345
NC19	182_VU107-M8_2	0.00274597	14.2603	-0.0234791	121.764	0.00670956	7.57153	0.423726	0.703578	20.7605	0.180928	47.0536	0.440023	375.988	3.17843	96.0408	0.907105
NC19	173_VU107-M8_2	7.51993e-05	629.048	-0.00312425	737.971	0.00531622	10.5002	0.443416	0.706133	24.0329	0.140287	54.1471	0.503426	426.523	3.53739	99.904	0.949227
NC19	251_VU107-M8	0.000190639	449.76	-0.00373283	402.158	0.0048779	10.86	0.448705	5.43688	25.0111	0.32287	55.6119	3.08215	436.786	21.536	99.7697	0.960549
NC19	245_VU107-M8	-0.000410608	129.849	0.00466386	269.523	0.00551235	9.25896	0.453745	4.83873	25.3349	0.327841	56.1057	2.74351	440.233	19.1338	100.484	0.971326
NC19	165_VU107-M8_2	0.00083207	61.5444	-0.00383656	703.064	0.00582506	10.5656	0.461079	0.746005	27.0116	0.159479	58.0428	0.553351	453.693	3.8309	99.0778	0.987038
NC19	161_VU107-M8_2	0.00260385	19.9352	-0.0262083	102.736	0.0061009	7.31957	0.472722	0.568396	26.1931	0.159702	53.7574	0.45683	423.782	3.21479	97.0226	1.01199
NC19	213_VU107-M8	0.00269431	23.7296	0.00468236	216.553	0.00604171	12.3216	0.477352	5.92553	29.713	0.320862	60.5606	3.6163	471.042	24.7998	97.2926	1.02186
NC19	169_VU107-M8_2	0.00016038	369.536	0.01526	190.788	0.00554784	8.38209	0.478343	0.642275	24.5201	0.149708	51.1631	0.500745	405.434	3.55933	99.8079	1.02397
NC19	253_VU107-M8	-0.00109179	55.4946	-0.00128207	833.329	0.00557403	10.3962	0.492762	5.45667	26.3768	0.326514	54.1888	2.98472	426.816	20.9692	101.234	1.05486
NC19	234_VU107-M8	0.00184266	36.2048	0.00207727	433.035	0.00635595	11.0947	0.49899	5.90788	27.6025	0.334509	54.2138	3.23297	426.991	22.7111	98.0059	1.06818
NC19	181_VU107-M8_2	0.00147983	26.8637	-0.00202815	1340.59	0.00747798	6.11764	0.521976	0.718786	28.513	0.114043	53.7777	0.452796	423.925	3.18615	98.4486	1.1174
NC19	223_VU107-M8	-0.0021687	33.7009	0.00640896	174.297	0.00539457	7.98181	0.524166	6.36721	30.315	0.326514	59.0705	3.78885	460.794	26.129	102.136	1.12207
NC19	168_VU107-M8_2	0.000712182	73.0331	0.00122041	2467.45	0.00628767	5.93581	0.533395	0.449666	28.8828	0.134384	53.7497	0.385351	423.728	2.71185	99.2626	1.14184
NC19	189_VU107-M8_2	0.000553503	90.7877	0.00958368	272.076	0.00553402	10.9668	0.53577	0.569113	29.3946	0.162077	54.5571	0.427493	429.401	2.99911	99.4388	1.14691
NC19	185_VU107-M8_2	0.000347074	132.587	0.0079587	333.132	0.00578223	9.79316	0.535782	0.679189	30.0065	0.160539	55.8126	0.466432	438.188	3.25662	99.6552	1.14694
NC19	164_VU107-M8_2	0.000776039	59.895	-0.00356215	739.865	0.00683191	7.81814	0.577139	0.620937	28.1865	0.1651	48.4353	0.393427	385.941	2.82644	99.1752	1.23549
NC19	162_VU107-M8_2	0.000792372	63.6633	0.00107639	2163.2	0.0076792	9.62296	0.584212	0.32532	32.2675	0.144473	54.827	0.323502	431.294	2.26721	99.2657	1.25062
NC19	188_VU107-M8_2	0.000661709	75.3952	0.029843	107.699	0.00646189	9.32028	0.592461	0.473071	30.5051	0.169059	51.1602	0.359709	405.414	2.55686	99.3584	1.26824
NC19	163_VU107-M8_2	0.000461177	90.3988	0.0211616	122.154	0.00749127	8.13717	0.598058	0.513673	33.442	0.234191	55.6907	0.377253	437.336	2.6352	99.5918	1.28023
NC19	224_VU107-M8	-0.00191224	30.1624	0.0181112	51.9938	0.00693449	9.40955	0.598633	6.59498	30.5332	0.315362	51.9612	3.44271	411.098	24.3954	101.873	1.28147
NC19	187_VU107-M8_2	0.00146463	47.8437	0.0120911	195.212	0.00702537	10.7078	0.617969	0.660123	32.2022	0.169722	51.4035	0.487439	407.142	3.46151	98.6434	1.32287
NC19	227_VU107-M8	-0.000414246	163.612	-0.00303787	384.136	0.00733253	8.8418	0.656144	7.38325	29.92	0.326449	45.7868	3.39785	366.815	24.6671	100.411	1.40461
NC19	148_VU107-M8_2	3.07376e-05	1573.53	-0.0119984	272.232	0.00903204	5.52753	0.698728	0.602864	38.585	0.140674	55.2058	0.399405	433.947	2.79511	99.9723	1.49579
NC19	239_VU107-M8	0.000725179	80.1293	1.08361e-05	79227.4	0.00867601	8.09102	0.700665	3.541	37.8345	0.317062	53.6881	1.92478	423.294	13.5486	99.4262	1.49992
NC19	179_VU107-M8_2	0.00159892	21.5774	-0.0143042	199.201	0.0105196	4.58777	0.714497	0.485262	43.2778	0.146327	59.8998	0.336363	466.505	2.31243	98.8933	1.52955
NC19	158_VU107-M8_2	0.000652068	78.8621	0.00678073	369.367	0.00879648	6.71921	0.718067	0.474056	44.9675	0.124792	62.3521	0.3731	483.287	2.54158	99.5669	1.53716
NC19	240_VU107-M8	0.000535642	118.881	-0.00254511	433.107	0.00908349	7.72712	0.754759	3.23247	43.5772	0.310578	57.5235	1.88496	450.095	13.0754	99.6311	1.61572
NC19	180_VU107-M8_2	0.00136141	25.8238	0.0109084	247.314	0.0107886	7.38248	0.757488	0.660711	39.2009	0.133788	51.2156	0.372175	405.807	2.6449	98.964	1.62154
NC19	175_VU107-M8_2	0.000106277	404.725	-0.0102802	210.958	0.00857911	6.9713	0.771726	0.349771	38.5796	0.129102	49.9479	0.249764	396.776	1.78376	99.9139	1.65205
NC19	171_VU107-M8_2	0.00184482	31.1858	0.0398483	70.0646	0.00958021	6.96012	0.775415	0.450189	43.7854	0.118056	55.7619	0.341397	437.834	2.38409	98.7477	1.65987
NC19	235_VU107-M8	0.00238812	30.6755	0.00328789	265.53	0.00952338	6.11737	0.785754	3.03359	38.5373	0.312008	48.1372	1.49444	383.798	10.7489	98.1488	1.68206
NC19	170_VU107-M8_2	0.000760273	86.1419	0.0212022	150.279	0.00935454	6.92501	0.794595	0.505067	46.8973	0.129046	58.737	0.392913	458.493	2.71305	99.5181	1.70096
NC19	229_VU107-M8	-0.00083169	79.0301	-0.00375058	352.475	0.00979115	5.38078	0.814082	5.48646	44.928	0.310095	55.4921	3.05886	435.949	21.3831	100.55	1.74271
NC19	176_VU107-M8_2	0.000723864	68.1722	-0.00365984	836.997	0.00943246	6.37456	0.825113	0.451427	47.0693	0.109697	56.7825	0.318615	444.948	2.21637	99.5387	1.76633
NC19	249_VU107-M8	-0.000876015	60.0711	0.00531543	164.06	0.00986908	5.56769	0.834697	3.16416	45.8259	0.311594	55.2145	1.7655	434.007	12.3549	100.57	1.78683
NC19	225_VU107-M8	-0.00223872	33.1126	0.00177588	626.176	0.00995288	3.89309	0.840754	5.54656	44.998	0.303648	54.3153	3.02848	427.704	21.2663	101.484	1.7998
NC19	222_VU107-M8	-0.0021859	34.911	0.000754518	1433.94	0.00981716	5.62272	0.851389	4.96345	46.1757	0.307382	55.0015	2.74812	432.516	19.2469	101.412	1.82257
NC19	228_VU107-M8	-0.000391092	145.733	-8.20721e-05	13494	0.0100956	7.28956	0.88183	4.09143	45.4642	0.336887	51.6882	2.13066	409.163	15.114	100.255	1.88774
NC19	212_VU107-M8	0.000568831	113.189	0.00190758	567.461	0.011082	6.12337	0.898311	4.11259	52.7923	0.304377	58.5788	2.4252	457.4	16.7559	99.6771	1.92301
NC19	231_VU107-M8	0.000166933	444.225	0.00185269	704.151	0.0112688	6.27872	0.923033	4.20175	51.1387	0.305121	55.3483	2.34404	434.944	16.3951	99.9013	1.97594
NC19	215_VU107-M8	-0.000172336	330.977	-0.00654095	161.926	0.0109619	7.68283	0.927316	3.21258	50.6964	0.306407	54.7238	1.77552	430.571	12.4484	100.099	1.98512
NC19	149_VU107-M8_2	0.000722503	85.7775	-0.021328	119.76	0.0117702	5.59778	0.965199	0.405746	48.2834	0.106565	49.7974	0.283583	395.701	2.02647	99.548	2.06623
NC19	208_VU107-M8	0.00111947	54.6125	-0.00964845	87.0682	0.0114747	7.24983	0.982731	2.42652	92.7247	0.378746	94.0117	2.31648	687.165	14.1166	99.6378	2.10375
NC19	233_VU107-M8	0.00115993	61.6811	0.00736333	126.473	0.0133804	5.53529	1.09154	2.54514	58.1146	0.395321	52.9235	1.3773	417.905	9.72348	99.4035	2.33665
NC19	243_VU107-M8	0.00120999	55.4393	0.000381911	2963.67	0.0148502	5.73614	1.18328	2.15702	60.5429	0.306805	50.859	1.12107	403.272	7.97803	99.4017	2.53305
NC19	156_VU107-M8_2	0.000777286	74.4551	0.0288091	103.257	0.0151571	4.31748	1.20638	0.46334	66.4495	0.100853	54.8913	0.297141	431.745	2.08195	99.6527	2.58246
NC19	183_VU107-M8_2	0.0283126	3.60302	-0.000697618	4346.53	0.0213973	4.48997	1.24927	0.683535	72.1122	0.236624	50.9564	0.446777	403.964	3.17827	88.2765	2.67431
NC19	241_VU107-M8	0.00232902	37.1265	-0.00300131	412.335	0.0176636	4.47723	1.42796	1.69361	78.9191	0.296582	54.7791	0.959303	430.958	6.72435	99.117	3.05683
NC19	221_VU107-M8	-0.00106743	71.8958	-0.00204518	633.002	0.01645	3.70373	1.43513	2.55148	76.7742	0.301364	53.7174	1.38924	423.501	9.77782	100.413	3.07219
NC19	209_VU107-M8	0.00141089	47.1136	-0.000332662	3545.99	0.0190153	3.40812	1.60109	2.32096	86.7408	0.299705	53.9122	1.26785	424.871	8.91672	99.5128	3.42745
NC19	242_VU107-M8	0.00170969	33.031	0.00543183	190.985	0.0204802	4.36382	1.63764	1.57282	92.4467	0.296553	56.1391	0.904575	440.466	6.30787	99.4468	3.50569
NC19	177_VU107-M8_2	0.00296385	17.0733	-0.0106241	212.629	0.0192873	5.13329	1.65853	0.313206	91.6291	0.110562	54.7119	0.203459	430.487	1.42654	99.0318	3.55044
J = 0.00484330 ± 0.00000387
NC27	070_VU107-M1	0.00258526	20.5643	0.00149313	880.557	0.00814372	6.73299	0.627406	4.07525	33.1465	0.316004	51.6002	2.12457	408.538	15.076	97.6701	0.551349
NC27	069_VU107-M1	0.00402438	15.9207	0.00584653	188.605	0.00894368	7.01101	0.733103	3.21756	48.5148	0.32194	64.5385	2.10373	498.12	14.215	97.5231	0.644231
NC27	057_VU107-M1	0.00217521	28.6435	0.0125624	102.049	0.014426	4.00112	1.12067	1.88196	58.1649	0.345336	51.3228	0.996299	406.569	7.07736	98.8836	0.984812
NC27	065_VU107-M1	0.00132444	42.7308	0.00808927	101.114	0.01438	6.14112	1.26598	1.43898	85.2091	0.298859	66.9942	0.993802	514.639	6.65486	99.5354	1.11251
NC27	029_VU107-M1	0.0190866	4.43909	0.00150076	664.711	0.0189749	3.79422	1.27735	1.68867	87.773	0.36291	64.253	1.13083	496.19	7.64914	93.5066	1.12251
NC27	045_VU107-M1	0.00137946	35.6308	8.66118e-05	13101.2	0.0175296	4.04725	1.47107	1.64758	69.0624	0.338467	46.6662	0.791424	373.187	5.72547	99.4018	1.29274
NC27	053_VU107-M1	0.00581621	9.34521	0.00268029	538.016	0.0189726	4.46755	1.5031	1.13523	94.4002	0.321042	61.6477	0.736271	478.482	5.02871	98.1594	1.32089
NC27	055_VU107-M1	0.0074539	9.24855	0.00802308	152.819	0.0190529	2.62694	1.5117	1.62202	71.0231	0.305572	45.5098	0.764245	364.803	5.55424	96.8657	1.32844
NC27	067_VU107-M1	0.00228304	24.9574	0.00707541	138.483	0.0195154	3.38215	1.6407	1.19119	76.5286	0.301431	46.2279	0.57771	370.014	4.18663	99.1082	1.44181
NC27	037_VU107-M1	0.00939789	8.96309	0.000165907	6296.78	0.021544	4.15136	1.67856	1.09451	60.5821	0.301082	34.4193	0.419748	282.372	3.19109	95.3662	1.47508
NC27	030_VU107-M1	0.00593066	10.9506	0.0127219	74.1937	0.0247953	3.29109	2.01388	1.21197	156.602	0.324399	76.8821	0.970124	579.682	6.2695	98.8689	1.76974
NC27	071_VU107-M1	0.00413805	14.3053	2.06806e-05	55548.7	0.024893	3.85835	2.02604	1.30615	95.5937	0.303386	46.572	0.630974	372.505	4.56641	98.7058	1.78044
NC27	048_VU107-M1	0.00191764	30.9593	-0.000444876	2463.32	0.0252132	3.66295	2.05929	1.2127	94.9262	0.413843	45.8177	0.593741	367.038	4.30981	99.395	1.80966
NC27	061_VU107-M1	0.00244402	32.8488	0.0049983	217.985	0.025331	3.09357	2.06842	1.31861	94.9893	0.29645	45.5703	0.626927	365.242	4.55517	99.2304	1.81768
NC27	046_VU107-M1	0.00367331	16.9831	0.00520063	239.877	0.0266565	2.83628	2.23572	0.811777	105.858	0.350385	46.8575	0.423266	374.571	3.05976	98.9626	1.96469
NC27	027_VU107-M1	0.00139655	40.9174	0.00964481	99.581	0.0275066	3.06136	2.31017	0.981838	109.865	0.309775	47.3762	0.493488	378.316	3.56009	99.6194	2.03012
NC27	064_VU107-M1	0.00425868	11.0995	0.0186221	45.7351	0.0320621	3.15083	2.55812	0.968798	122.148	0.321078	47.2521	0.485914	377.421	3.50717	98.9585	2.248
NC27	051_VU107-M1	0.0166965	5.33289	0.00133129	818.238	0.0340726	3.5397	2.59345	0.951756	164.913	0.311338	61.6656	0.627834	478.604	4.2878	96.976	2.27906
NC27	059_VU107-M1	0.00404047	14.8165	0.00513021	230.009	0.0312608	2.89292	2.61375	0.958089	90.9473	0.297695	34.3335	0.351586	281.72	2.67385	98.6716	2.2969
NC27	072_VU107-M1	0.0191042	3.58389	-0.00530969	223.165	0.0349635	2.64967	2.6315	0.85607	123.694	0.298789	44.8365	0.41606	359.902	3.03187	95.3866	2.3125
NC27	035_VU107-M1	0.00526601	11.5037	0.00432449	206.332	0.03261	2.77755	2.6592	0.862005	124.028	0.299332	46.0491	0.426245	368.717	3.09117	98.7308	2.33684
NC27	036_VU107-M1	0.00649927	7.98025	0.00719992	162.438	0.0334447	2.28288	2.68277	0.966673	653.402	0.297023	242.832	2.45702	1423.79	10.0121	99.7028	2.35755
NC27	063_VU107-M1	0.00334705	16.3856	0.00934023	94.4608	0.0344518	3.04951	2.92867	0.797585	137.163	0.299892	46.4928	0.400451	371.932	2.89901	99.2702	2.57364
NC27	033_VU107-M1	0.00588986	11.1074	-0.00807845	190.646	0.03734	2.56973	3.0781	0.850813	146.547	0.340457	47.0372	0.436417	375.869	3.15259	98.7978	2.70497
NC27	039_VU107-M1	0.00879444	7.15363	-0.00017056	6681.04	0.0394387	3.04026	3.22647	0.818053	150.425	0.536981	45.8075	0.454412	366.964	3.29859	98.2526	2.83534
NC27	066_VU107-M1	0.00372954	15.5132	0.0160414	63.1073	0.0416086	2.80484	3.50565	0.781328	160	0.296803	45.3227	0.382334	363.442	2.78072	99.303	3.08068
NC27	054_VU107-M1	0.00618183	9.13825	0.01072	97.3077	0.043458	2.2021	3.56551	0.638153	162.31	0.294528	45.004	0.320462	361.123	2.33368	98.8615	3.13329
NC27	026_VU107-M1	0.0139954	6.90735	-0.00176664	553.973	0.0463086	2.22296	3.67517	0.972746	180.218	0.304306	47.8988	0.495514	382.083	3.56737	97.6796	3.22966
NC27	047_VU107-M1	0.00906921	6.20579	0.000321578	2526.1	0.0486797	3.00024	3.95734	0.815012	181.897	0.432159	45.2794	0.421245	363.127	3.06425	98.5096	3.47762
NC27	049_VU107-M1	0.00677216	10.0392	0.000890033	1273.31	0.0488185	2.75602	3.9772	0.72242	295.96	0.343398	73.905	0.594104	560.341	3.88023	99.3157	3.49507
NC27	025_VU107-M1	0.00542501	12.5486	-0.00342574	212.165	0.0480768	1.89315	3.98515	0.951652	301.133	0.330128	75.1565	0.759198	568.496	4.93646	99.4609	3.50206
NC27	024_VU107-M1	0.00286995	23.0644	0.000966511	1103.77	0.0505903	3.18885	4.17454	0.632585	196.791	0.331965	46.9347	0.338942	375.129	2.44944	99.5628	3.66849
NC27	031_VU107-M1	0.0152604	4.60511	0.00189187	576.28	0.0529098	1.72335	4.20069	0.682782	195.654	0.366381	45.4911	0.357906	364.667	2.60131	97.6696	3.69147
NC27	032_VU107-M1	0.0101976	10.3488	0.00833232	124.313	0.0558575	1.73624	4.47111	0.776373	207.245	0.329757	45.6704	0.392496	365.969	2.85069	98.5294	3.92911
NC27	038_VU107-M1	0.0182418	4.92603	-0.00298272	334.597	0.0561936	2.20769	4.53376	0.67689	342.549	0.334426	74.3529	0.56626	563.263	3.69248	98.4089	3.98417
NC27	023_VU107-M1	0.00846476	7.87486	0.000690147	1642.73	0.0606955	2.59405	4.84931	1.07787	356.517	0.366484	72.9972	0.832684	554.402	5.45613	99.29	4.26146
NC27	073_VU107-M1	0.0247205	3.72205	-0.00467676	255.427	0.0625139	2.26857	4.92142	0.64096	345.398	0.294907	68.6819	0.489653	525.906	3.25877	97.8618	4.32483
NC27	052_VU107-M1	0.00887757	8.76792	0.00566955	189.409	0.0595396	2.32337	4.97928	0.597913	215.295	0.319884	42.705	0.294122	344.304	2.16164	98.7671	4.37568
NC27	058_VU107-M1	0.00248801	21.1194	-0.00387448	315.845	0.0658516	2.08621	5.59528	0.609425	261.11	0.296954	46.5325	0.316872	372.22	2.29359	99.7136	4.91701
J = 0.00484330 ± 0.00000387
NC7	081_VU107-M3_2	0.000419891	92.7166	0.0085458	271.209	0.00496512	11.2642	0.424222	0.804224	21.1587	0.181304	49.5825	0.49222	394.164	3.52034	99.409	0.36233
NC7	087_VU107-M3_2	0.00224691	23.7744	-0.00639175	418.868	0.00595464	9.63246	0.430244	0.721974	22.821	0.137262	51.4804	0.529989	407.688	3.76255	97.0567	0.367482
NC7	105_VU107-M3_2	0.000376677	145.64	-0.0116541	225.269	0.00549193	13.4	0.442021	0.670581	21.9508	0.152051	49.4019	0.502759	392.873	3.59825	99.4818	0.377544
NC7	056_VU107-M3_2	0.000361819	75.3484	-0.0230947	124.533	0.00597324	7.96431	0.465876	0.661548	25.3375	0.192493	54.1483	0.412094	426.531	2.89562	99.565	0.397926
NC7	072_VU107-M3_2	0.00109578	53.1532	-0.0103477	251.595	0.00631541	10.0373	0.517603	0.494345	33.8369	0.131578	64.7369	0.47191	499.46	3.1864	99.0294	0.442099
NC7	067_VU107-M3_2	0.00937008	5.68151	-0.00752088	288.104	0.00830465	8.57096	0.520171	0.409902	51.4015	0.111442	93.4355	0.50231	683.651	3.06696	94.5555	0.444291
NC7	163_VU107-M3	0.00541641	9.20759	0.0059353	164.326	0.00731481	10.8962	0.539916	7.02282	29.1682	0.322276	51.0287	3.5985	404.479	25.5917	94.4559	0.461148
NC7	090_VU107-M3_2	0.00060046	85.7524	-0.0076394	352.007	0.00733958	6.78967	0.578347	0.450954	31.9876	0.137126	54.9963	0.37139	432.48	2.60114	99.4362	0.49398
NC7	069_VU107-M3_2	0.00579035	7.75285	0.00189542	1341.14	0.00820398	7.83356	0.59834	0.616624	32.2642	0.128736	51.0331	0.392518	404.51	2.79145	94.6407	0.511051
NC7	065_VU107-M3_2	0.000700499	85.252	-0.014671	173.381	0.00806218	9.12089	0.604868	0.459231	38.9303	0.134507	64.0122	0.425215	494.56	2.8788	99.4586	0.516636
NC7	103_VU107-M3_2	0.00106867	37.9348	-0.00736119	386.523	0.00718184	9.23215	0.608106	0.494672	31.2289	0.128864	50.8275	0.327456	403.047	2.33062	98.9748	0.519397
NC7	079_VU107-M3_2	0.00182509	28.0881	-0.0120874	280.421	0.00785512	6.81656	0.630312	0.514042	33.0268	0.124202	51.53	0.365215	408.04	2.59227	98.3456	0.538366
NC7	055_VU107-M3_2	0.000837514	37.7347	0.0008675	3141.23	0.00861365	6.93663	0.680455	0.357721	35.0934	0.109351	51.2052	0.236586	405.733	1.68139	99.2861	0.581187
NC7	057_VU107-M3_2	0.00119763	38.6268	-0.00785801	362.483	0.00833452	7.0769	0.690878	0.487846	36.2758	0.148589	51.9871	0.332244	411.282	2.35408	99.011	0.590094
NC7	075_VU107-M3_2	0.000672597	72.8221	0.00544666	558.909	0.00853319	7.22645	0.699191	0.451774	37.8215	0.128204	53.806	0.328111	424.124	2.30854	99.4686	0.597187
NC7	080_VU107-M3_2	0.000865076	55.0202	-0.0192079	91.58	0.00914949	5.63155	0.742949	0.561842	38.7596	0.11158	51.8185	0.353178	410.087	2.50404	99.3281	0.634575
NC7	077_VU107-M3_2	0.000907382	46.2942	-0.0058126	381.794	0.00925186	5.6962	0.744168	0.500319	58.2557	0.111391	77.9172	0.433571	586.359	2.79179	99.5331	0.635609
NC7	066_VU107-M3_2	0.00332624	13.5122	-0.0101299	259.278	0.00958988	5.68813	0.764029	0.550725	40.4565	0.116146	51.6494	0.33993	408.887	2.41169	97.5417	0.652575
NC7	099_VU107-M3_2	0.000699705	75.0217	0.015563	168.969	0.00952897	6.16712	0.77845	0.407824	39.9879	0.144052	51.1016	0.299085	404.997	2.12642	99.479	0.664878
NC7	063_VU107-M3_2	0.000563484	93.6059	-0.00746583	419.572	0.0102189	4.43485	0.789989	0.294727	43.4175	0.115034	54.7448	0.264155	430.718	1.85187	99.6097	0.674746
NC7	078_VU107-M3_2	0.000215163	273.28	-0.00533423	392.379	0.00883273	6.84311	0.791709	0.555176	38.6962	0.159564	48.7941	0.358661	388.517	2.57305	99.8311	0.676215
NC7	093_VU107-M3_2	0.00201734	23.1908	-0.0167564	159.812	0.0100775	5.72665	0.793394	0.563685	41.8325	0.108872	51.9636	0.346545	411.116	2.45563	98.5555	0.67766
NC7	068_VU107-M3_2	0.000992563	42.4412	-0.0251166	94.9935	0.00994141	7.41312	0.836806	0.513813	59.396	0.102837	70.6207	0.399481	538.763	2.64004	99.4965	0.714744
NC7	054_VU107-M3_2	0.000867684	43.2874	-0.00270818	1078.21	0.0112237	5.22316	0.901581	0.305488	47.1992	0.109902	52.0631	0.209963	411.82	1.48723	99.4491	0.770056
NC7	169_VU107-M3	0.000322841	189.843	0.00954708	146.424	0.0108666	6.30335	0.963004	2.09441	49.0886	0.308485	50.8746	1.0937	403.382	7.78283	99.8035	0.822511
NC7	100_VU107-M3_2	0.00123982	40.6674	0.0201433	126.731	0.0121531	7.73487	1.01142	0.356528	51.8847	0.181565	50.9345	0.252609	403.808	1.79716	99.288	0.863855
NC7	097_VU107-M3_2	0.000163102	279.631	0.00687958	494.574	0.0126312	4.33765	1.02077	0.54614	52.6146	0.109201	51.4961	0.316337	407.8	2.24563	99.9069	0.871854
NC7	101_VU107-M3_2	0.0032414	19.5863	-0.0192434	123.332	0.0132947	5.17764	1.05609	0.376342	54.8159	0.105477	50.9851	0.26839	404.168	1.90905	98.2301	0.902038
NC7	053_VU107-M3_2	0.000769007	70.0728	-0.0159499	160.485	0.0134046	5.54539	1.10825	0.462819	55.9305	0.107892	50.2577	0.279545	398.987	1.99403	99.5855	0.946584
NC7	091_VU107-M3_2	0.00118538	51.704	-0.0057429	549.256	0.0140097	5.12665	1.13017	0.391007	87.1978	0.0983799	76.8398	0.349645	579.409	2.25995	99.5925	0.965302
NC7	095_VU107-M3_2	0.00124402	34.7023	-0.0182006	129.692	0.0146365	4.4406	1.21414	0.29794	60.6104	0.0962999	49.6119	0.188233	394.374	1.34608	99.3831	1.03703
NC7	174_VU107-M3	0.00136755	39.7468	0.0138689	65.8431	0.0150779	3.62554	1.2372	1.95311	67.4967	0.300805	54.2264	1.07975	427.08	7.58467	99.3951	1.0567
NC7	180_VU107-M3	0.00161001	29.0656	0.0116552	92.5612	0.014279	4.12191	1.25624	1.8657	64.4838	0.301376	50.9485	0.96946	403.908	6.89673	99.2543	1.07297
NC7	089_VU107-M3_2	0.000966022	55.2741	-0.00912438	266.32	0.0154052	4.73118	1.26522	0.46258	64.9658	0.106188	51.1177	0.273432	405.112	1.94391	99.5533	1.08065
NC7	047_VU107-M3_2	0.00104009	43.3481	-0.0177098	179.386	0.0166028	4.58574	1.35603	0.376807	74.0192	0.103715	54.354	0.234541	427.976	1.64672	99.577	1.15821
NC7	161_VU107-M3	0.00061514	65.1884	0.0038968	280.022	0.0167727	3.91551	1.357	3.01718	66.8867	0.304362	49.1542	1.49325	391.099	10.6976	99.7242	1.15903
NC7	074_VU107-M3_2	0.000876645	59.0544	0.00724122	329.012	0.0181038	4.05779	1.47082	0.305479	75.3693	0.184168	51.0647	0.21044	404.734	1.49639	99.6518	1.25625
NC7	173_VU107-M3	0.000668836	50.5965	0.00632904	171.839	0.0177819	3.93583	1.49105	1.80917	81.4095	0.298445	54.4646	1.00104	428.752	7.02535	99.7537	1.27352
NC7	175_VU107-M3	0.00256972	27.8445	0.00658256	181.221	0.0180851	3.66998	1.53053	1.85672	78.4788	0.531274	50.7741	0.991185	402.667	7.05606	99.0214	1.30724
NC7	096_VU107-M3_2	0.00178902	24.4374	0.00420457	665.512	0.0195662	2.29557	1.60296	0.474997	83.6441	0.150246	51.8472	0.27098	410.29	1.92104	99.3602	1.36911
NC7	159_VU107-M3	0.00073819	77.1712	0.0067081	154.33	0.0194777	4.16512	1.64558	2.149	85.2704	0.297055	51.6836	1.12605	409.13	7.9879	99.7405	1.40551
NC7	156_VU107-M3	0.00285132	28.2372	0.00361673	350.648	0.0189975	3.79659	1.66949	2.16987	79.0156	0.325616	46.8186	1.03757	374.289	7.50166	98.9212	1.42594
NC7	162_VU107-M3	0.0045802	11.5527	0.00231468	516.559	0.02101	3.64927	1.67659	2.4238	85.4024	0.296283	50.1218	1.22781	398.017	8.76281	98.3973	1.432
NC7	071_VU107-M3_2	0.000957062	45.8344	0.00158557	1443.18	0.0202341	4.03339	1.68397	0.298646	87.0003	0.105998	51.4934	0.180827	407.78	1.28368	99.67	1.4383
NC7	157_VU107-M3	0.000802361	71.5147	-0.00515624	236.357	0.0198578	4.42187	1.73747	1.52914	85.7424	0.304567	49.21	0.773663	391.498	5.54127	99.7184	1.484
NC7	179_VU107-M3	0.00136965	36.272	-0.00400676	304.801	0.0207697	4.19121	1.76937	1.53478	90.4414	0.296023	50.8828	0.799867	403.441	5.69169	99.5458	1.51125
NC7	172_VU107-M3	0.00122201	43.8747	0.00386745	337.067	0.0210661	4.12337	1.77466	1.31393	91.5839	0.297174	51.4002	0.698405	407.118	4.95974	99.6003	1.51576
NC7	073_VU107-M3_2	0.000682465	66.5581	0.0127385	167.551	0.0220302	3.81075	1.8072	0.330058	86.4207	0.0994533	47.7073	0.1808	380.704	1.30262	99.7636	1.54355
NC7	088_VU107-M3_2	0.00146565	32.627	-0.00534267	511.323	0.0227711	2.52225	1.83918	0.348182	94.5746	0.102939	51.1832	0.201467	405.577	1.43192	99.5352	1.57087
NC7	062_VU107-M3_2	0.00793585	7.59439	-0.00452994	457.128	0.0244449	2.77846	1.92623	0.370132	101.677	0.101567	51.5544	0.219134	408.213	1.55525	97.6678	1.64523
NC7	061_VU107-M3_2	0.00276559	19.9489	0.00712069	322.607	0.0245636	3.35944	1.9592	0.327894	100.675	0.100073	50.9639	0.194009	404.018	1.3801	99.1788	1.67338
NC7	154_VU107-M3	0.00117978	45.2019	-0.000115681	10559.8	0.0237926	3.5189	2.03386	1.71079	76.0237	0.30666	37.2049	0.651457	303.428	4.89599	99.5344	1.73715
NC7	102_VU107-M3_2	0.00105324	58.2685	-0.000252333	9825.4	0.0280333	3.08989	2.27487	0.273421	118.876	0.117658	52.117	0.174856	412.202	1.2383	99.7338	1.94301
NC7	177_VU107-M3	0.00147164	44.6746	-0.000354293	3291.55	0.0267609	3.19328	2.32979	0.932643	117.372	0.294366	50.1891	0.498191	398.498	3.55462	99.6239	1.98991
NC7	166_VU107-M3	0.00276907	21.0016	0.0101873	118.445	0.0286035	3.92305	2.33094	1.04764	119.449	0.29379	50.8901	0.558983	403.493	3.9775	99.3069	1.99088
NC7	171_VU107-M3	0.00228756	21.8343	0.00366449	262.163	0.0280438	2.34416	2.33232	1.8468	91.0038	0.299202	38.725	0.727455	314.817	5.43323	99.2476	1.99207
NC7	151_VU107-M3	0.00155874	35.2549	-0.00608302	211.062	0.0296198	2.60247	2.4409	1.06843	123.006	0.293741	50.2018	0.560465	398.588	3.99874	99.6196	2.08482
NC7	165_VU107-M3	0.00268494	25.6467	0.00103286	951.676	0.0307289	2.94624	2.58086	1.18374	127.856	0.296007	49.2285	0.606164	391.631	4.34126	99.3714	2.20435
NC7	060_VU107-M3_2	0.00331353	18.0518	-0.00159034	1269.35	0.0326168	2.68099	2.64239	0.298114	136.117	0.0914817	51.1377	0.173292	405.253	1.23189	99.2714	2.25691
NC7	167_VU107-M3	0.00193771	25.8507	0.00648555	224.914	0.0430437	2.00461	3.52456	0.841605	184.739	0.292397	52.2499	0.46761	413.143	3.30983	99.6855	3.01038
NC7	160_VU107-M3	0.00130294	53.7631	0.00202229	532.016	0.041731	2.20811	3.60269	1.18783	182.467	0.294762	50.5386	0.621318	400.99	4.4271	99.7852	3.07712
NC7	094_VU107-M3_2	0.00179503	27.7818	-0.00102738	2815.46	0.047537	2.10326	3.9319	0.271082	204.719	0.0914925	51.9289	0.153362	410.87	1.08687	99.7365	3.3583
NC7	181_VU107-M3	0.00292729	19.3874	-0.00400929	276.572	0.0519713	1.7376	4.36099	0.875016	229.147	0.321233	52.3434	0.489669	413.805	3.46472	99.6168	3.72479
NC7	059_VU107-M3_2	0.00599632	11.6519	-0.00798477	361.529	0.0557638	2.59975	4.59997	0.194692	239.851	0.101649	51.7516	0.12255	409.612	0.869104	99.2517	3.92891
NC7	153_VU107-M3	0.00265153	23.3964	0.00446767	270.822	0.0587247	1.82588	4.85797	0.853329	246.826	0.292108	50.6447	0.458529	401.746	3.26583	99.6777	4.14927
NC7	155_VU107-M3	0.00326435	10.285	0.00427684	289.211	0.0679898	1.67532	5.83739	0.746111	293.388	0.295847	50.0924	0.402604	397.807	2.87368	99.6662	4.98581
NC7	178_VU107-M3	0.00527263	12.7525	-0.00206697	492.917	0.0709258	1.61158	5.98363	0.577673	304.807	0.289945	50.6762	0.329604	401.97	2.34728	99.4818	5.11072
NC7	168_VU107-M3	0.00223618	34.5074	0.00347855	376.948	0.0717507	1.90817	6.02155	0.681265	310.842	0.293281	51.51	0.384096	407.898	2.7265	99.7836	5.1431
